# Supplementary material for: Repurposing Ponatinib as a Potent Agent against KIT Mutant Melanomas
Source: PubMed Central journal article supplement — Theranostics. 2019 Mar 16;9(7):1952–64. doi: 10.7150/thno.30890 (PMC6485277; doi:10.7150/thno.30890), 2019-03-16
Supplement: thnov09p1952s1.pdf [file thnov09p1952s1.pdf]

## Supplementary figures

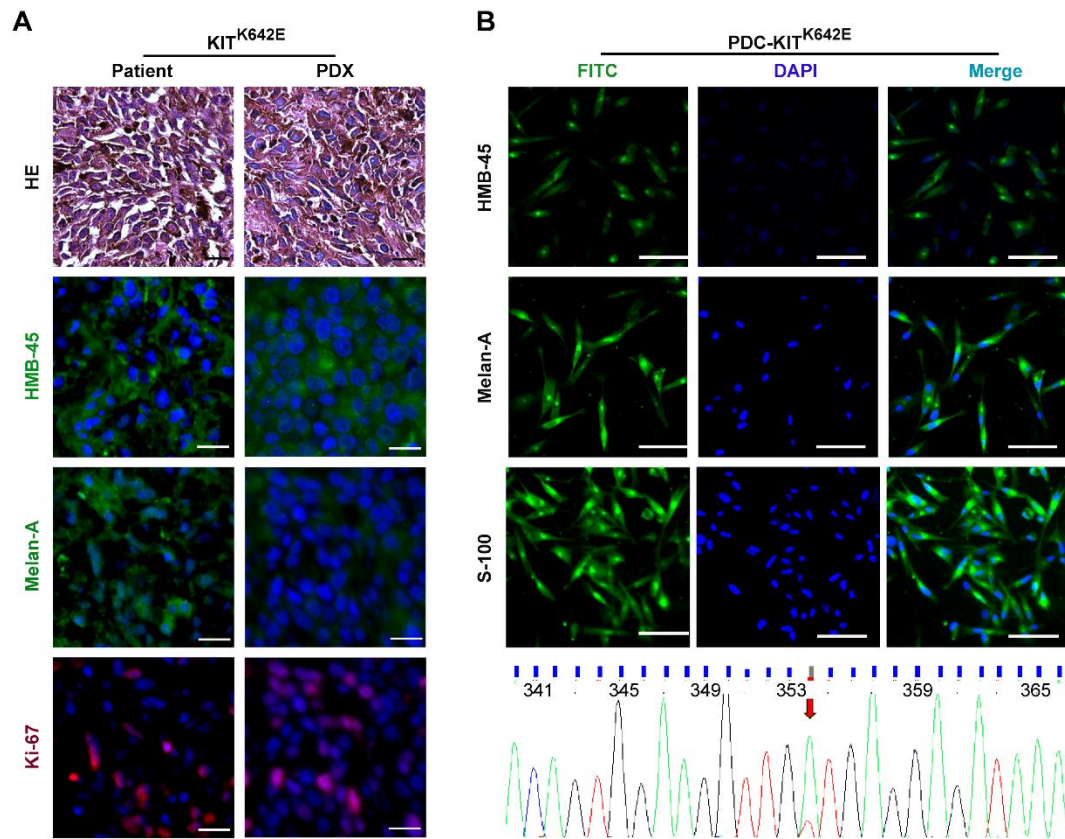

**Figure S1.** Establishment and characterization of  $KIT^{K642E}$  PDX models. **(A)** Representative hematoxylin and eosin (H&E) staining and immunofluorescence staining of patient tumors and corresponding PDXs. HMB-45 and Melan-A (both green), Ki67 (red) and DAPI (blue). The scale bar is 100  $\mu$ m. **(B)** Representative immunofluorescence staining of PDX-derived cells is shown in the upper panel, and the  $KIT$  mutation status of the corresponding PDX-derived cells is shown in the bottom panel. HMB-45, Melan-A and S-100 (both green) and DAPI (blue). The scale bar is 100  $\mu$ m.

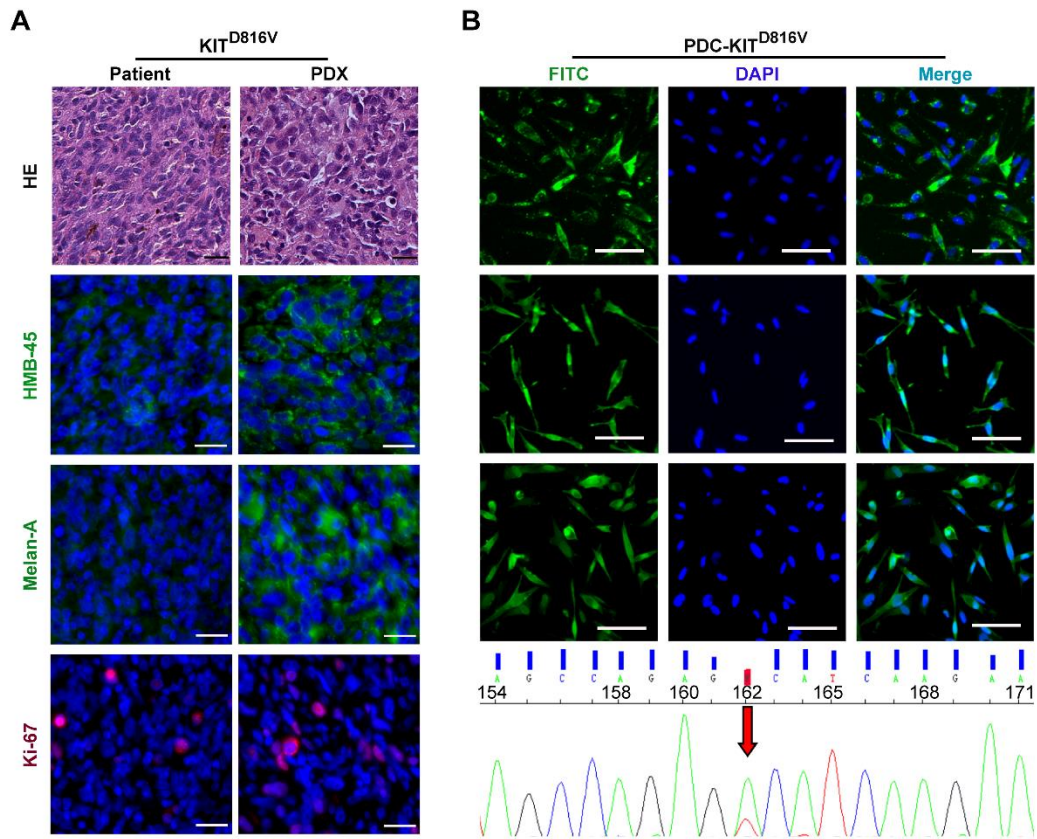

**Figure S2.** Establishment and characterization of *KIT*<sup>D816V</sup> PDX models. **(A)** Representative hematoxylin and eosin (H&E) staining and immunofluorescence staining of patient tumors and corresponding PDXs. HMB-45 and Melan-A (both green), Ki67 (red) and DAPI (blue). The scale bar is 100  $\mu$ m. **(B)** Representative immunofluorescence staining of PDX-derived cells is shown in the upper panel, and the *KIT* mutation status of the corresponding PDX-derived cells is shown in the bottom panel. HMB-45, Melan-A and S-100 (both green) and DAPI (blue). The scale bar is 100  $\mu$ m.

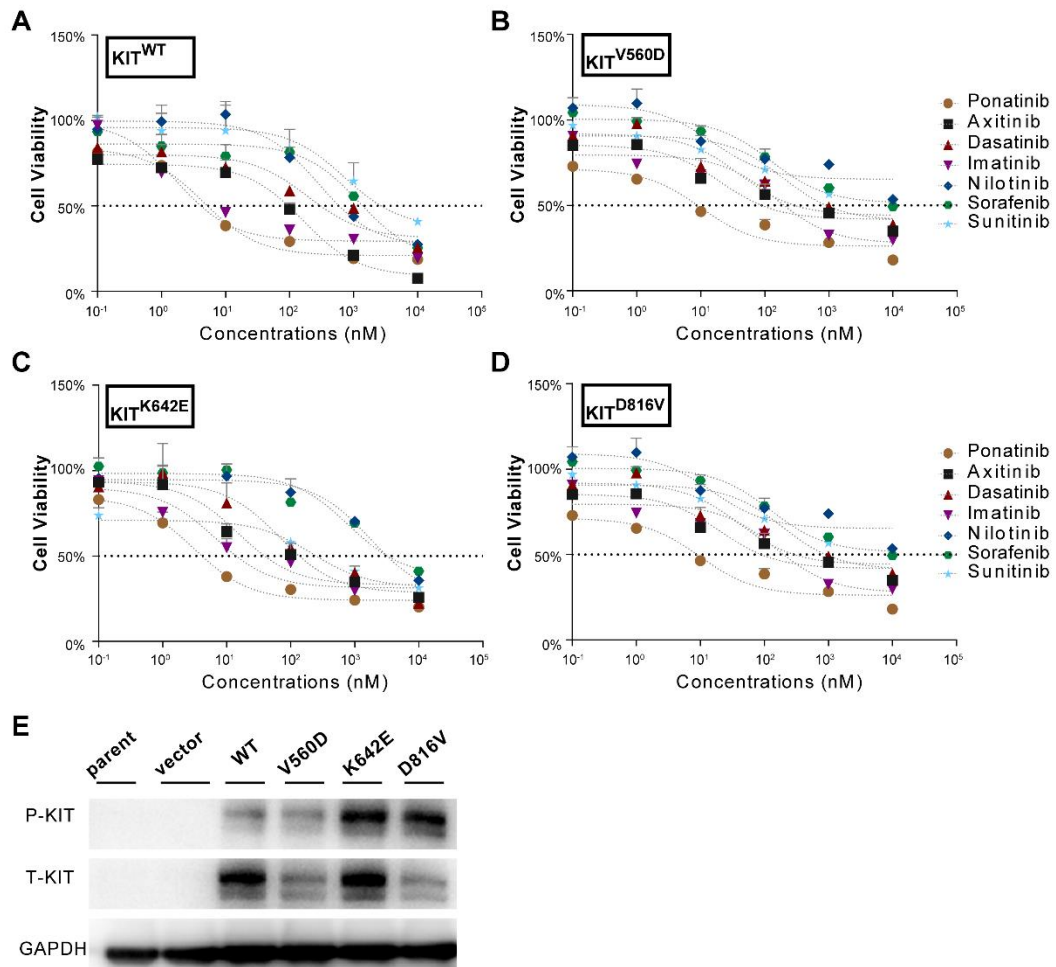

**Figure S3.** Dose-response curve of imatinib, dasatinib axitinib, nilotinib, ponatinib, sorafenib, and sunitinib in 72-h proliferation assays in Ba/f3 cell lines transfected with  $KIT^{WT}$ ,  $KIT^{V560D}$ ,  $KIT^{K642E}$  and  $KIT^{D816V}$ . **(A)** Inhibitory efficacy of inhibitors in Ba/f3 cell lines transfected with  $KIT^{WT}$ . **(B)** Inhibitory efficacy of inhibitors in Ba/f3 cell lines transfected with  $KIT^{V560D}$ . **(C)** Inhibitory efficacy of inhibitors in Ba/f3 cell lines transfected with  $KIT^{K642E}$ . **(D)** Inhibitory efficacy of inhibitors in Ba/f3 cell lines transfected with and  $KIT^{D816V}$ . **(E)** Expression of  $KIT$  in transfected Ba/F3 cells.

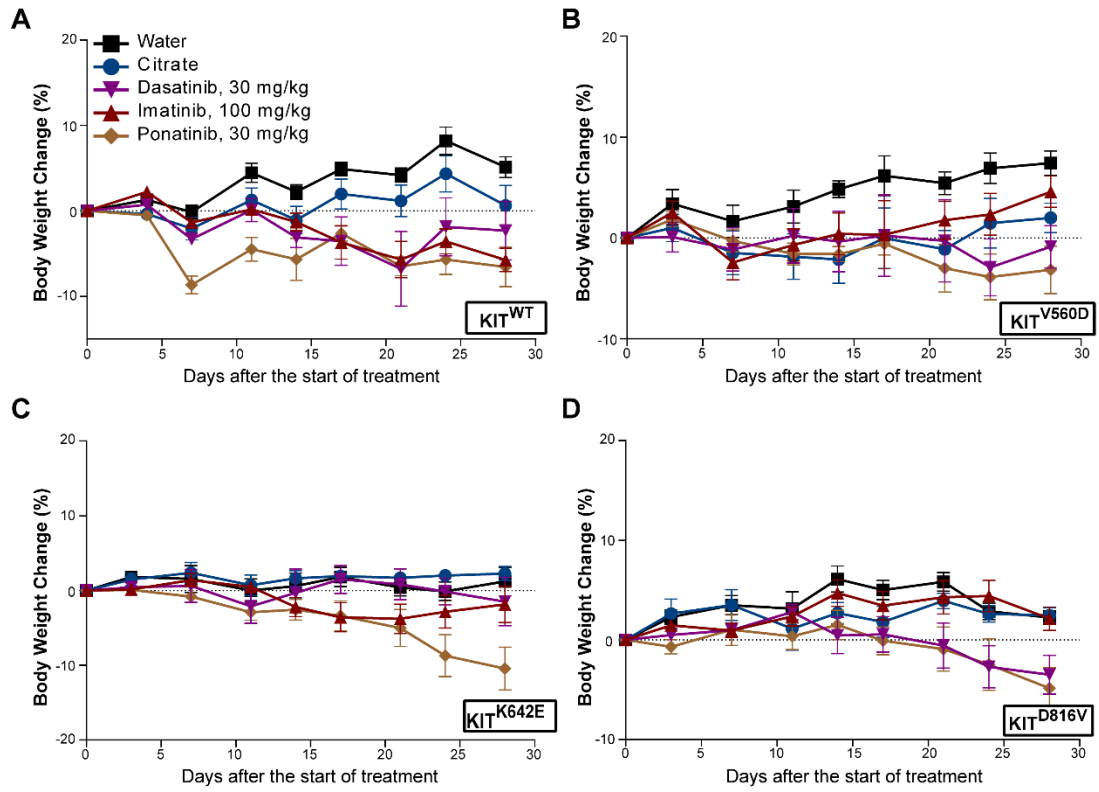

**Figure S4.** Treatment toxicity evaluation in PDXs. Treatment relative toxicities were determined by body weight during the treatment. **(A)** PDX with  $KIT^{WT}$ . **(B)** PDX with  $KIT^{V560D}$  mutation. **(C)** PDX with  $KIT^{K642E}$  mutation. **(D)** PDX with  $KIT^{D816V}$  mutation.

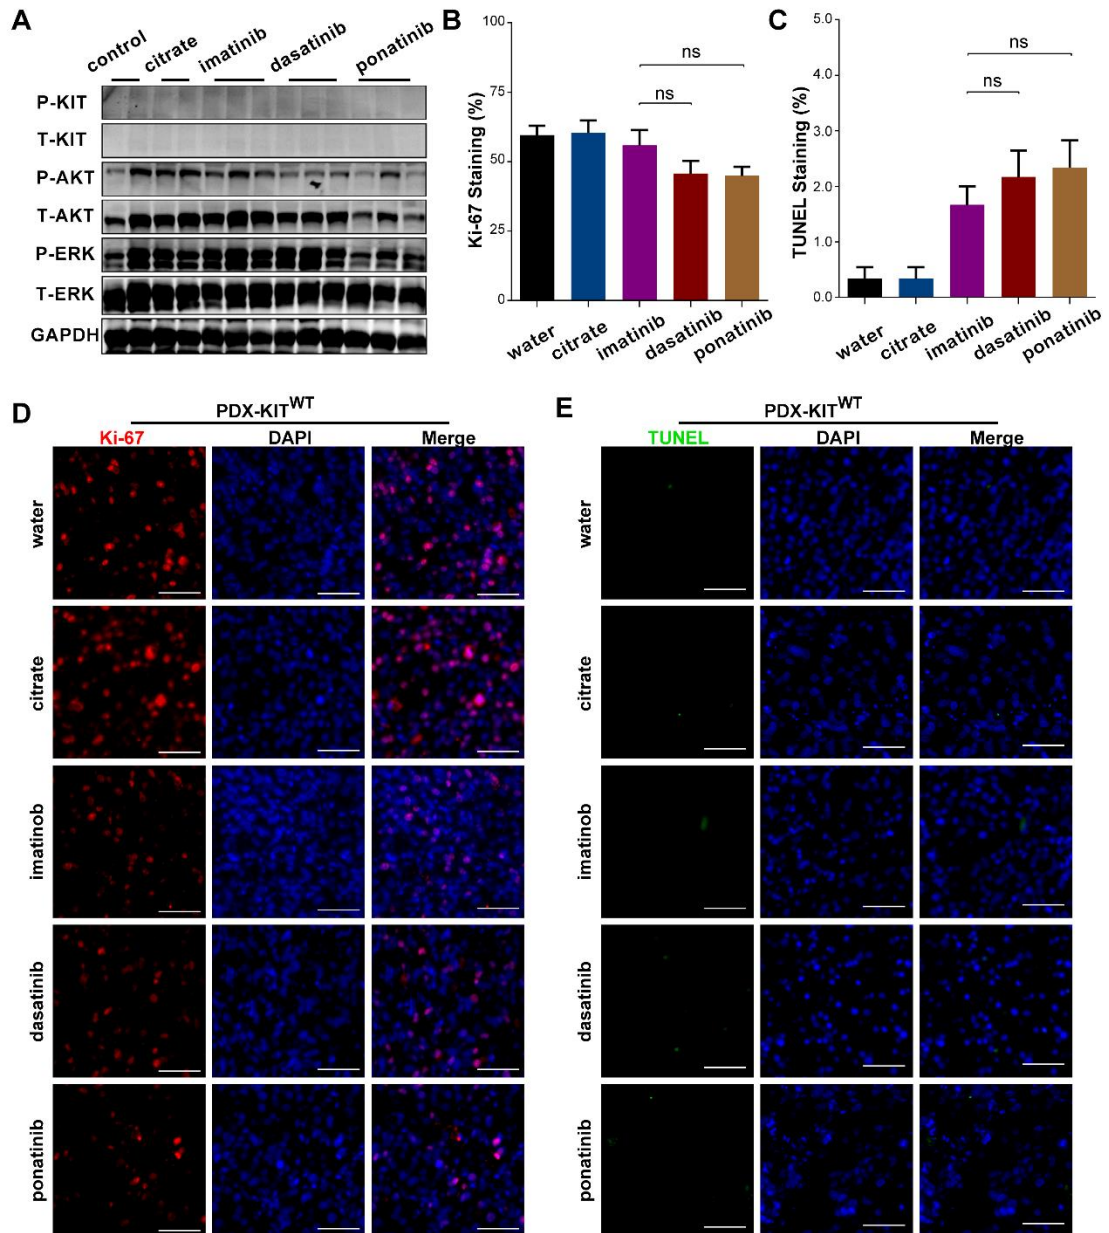

**Figure S5.** Inhibitory efficacy of ponatinib in PDX-KIT<sup>WT</sup>. **(A)** Immunoblot analysis of *KIT* signaling in tumors after 28 days of treatment with imatinib, dasatinib and ponatinib. **(B)** Scoring of Ki-67 staining is summarized as the mean  $\pm$  SEM. Student's *t*-test,  $P > 0.05$ ; ns, not significant. **(C)** Scoring of TUNEL staining is summarized as the mean  $\pm$  SEM. Student's *t*-test,  $P > 0.05$ ; ns, not significant. **(D)** Representative Ki-67 staining in tumors after 28 days of treatment with imatinib, dasatinib and ponatinib. Scale bar, 50 $\mu$ m. **(E)** Representative TUNEL staining in tumors after 28 days of treatment with imatinib, dasatinib and ponatinib. Scale bar, 50 $\mu$ m.

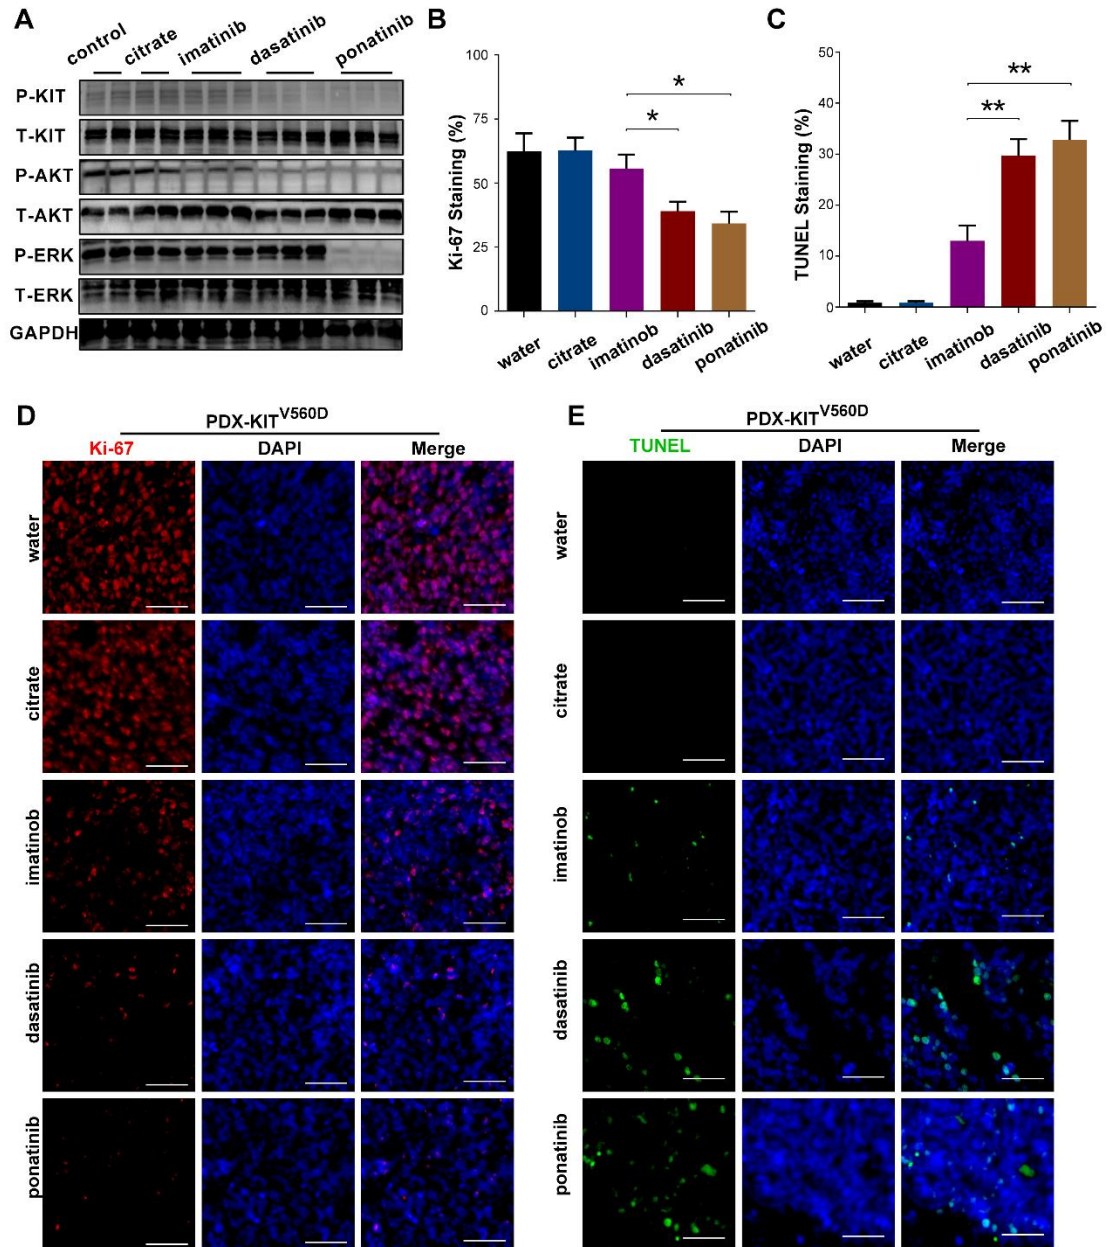

**Figure S6.** Inhibitory efficacy of ponatinib in PDX with  $KIT^{V560D}$  mutation. **(A)** Immunoblot analysis of  $KIT$  signaling in tumors after 28 days of treatment with imatinib, dasatinib and ponatinib. **(B)** Scoring of Ki-67 staining is summarized as the mean  $\pm$  SEM. Student's  $t$ -test, \*,  $P < 0.05$ . **(C)** Scoring of TUNEL staining is summarized as the mean  $\pm$  SEM. Student's  $t$ -test, \*\*,  $P < 0.01$ . **(D)** Representative Ki-67 staining in tumors after 28 days of treatment with imatinib, dasatinib and ponatinib. Scale bar,  $50\mu\text{m}$ . **(E)** Representative TUNEL staining in tumors after 28 days of treatment with imatinib, dasatinib and ponatinib. Scale bar,  $50\mu\text{m}$ .

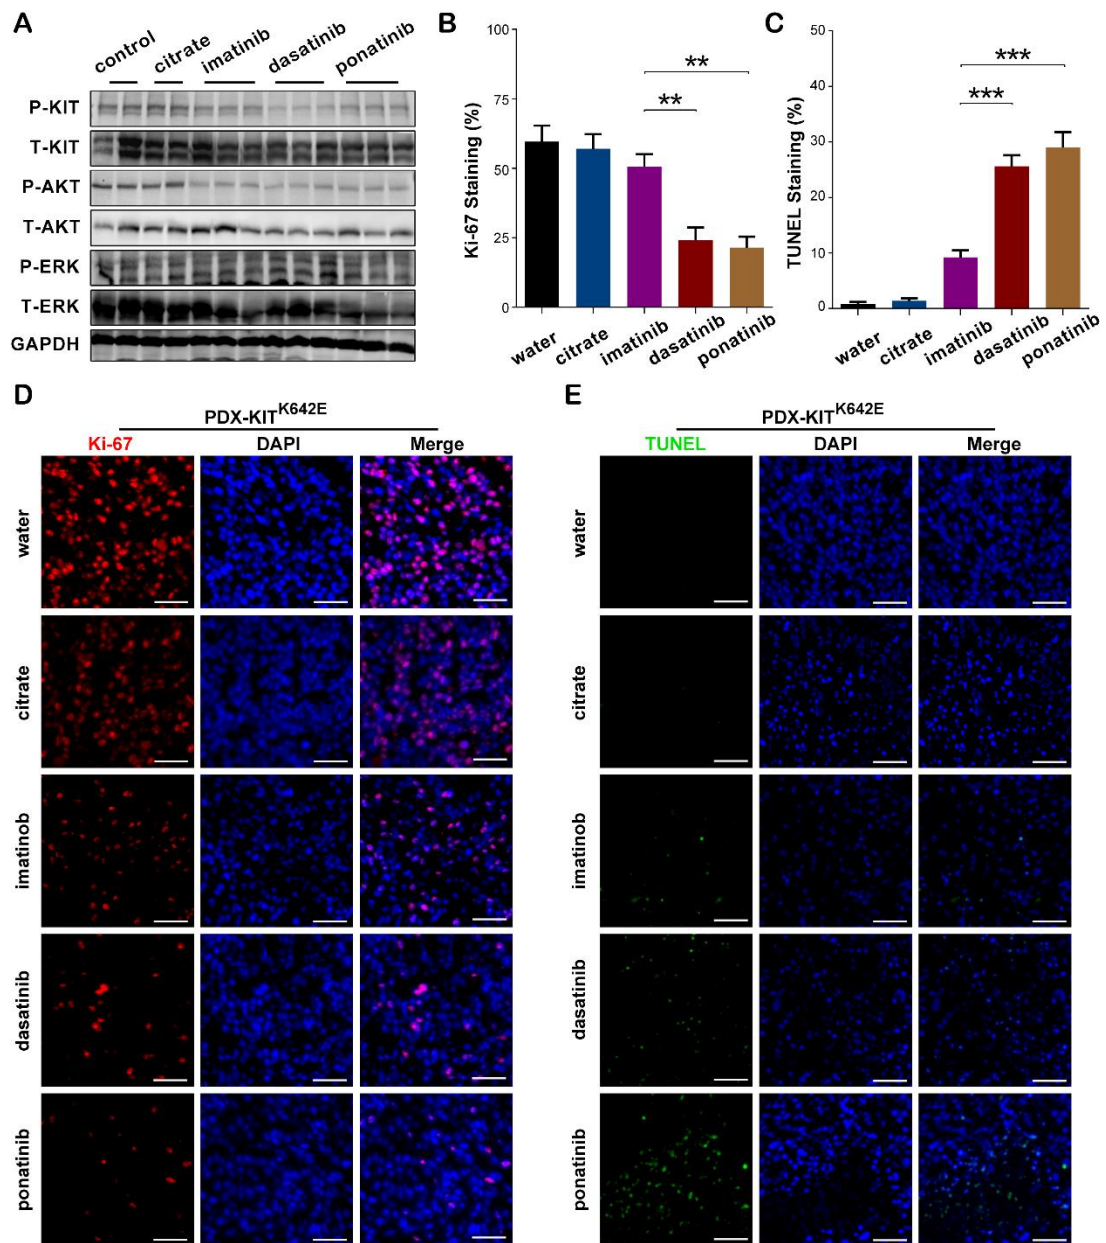

**Figure S7.** Inhibitory efficacy of ponatinib in PDX with *KIT*<sup>K642E</sup> mutation. **(A)** Immunoblot analysis of *KIT* signaling in tumors after 28 days of treatment with imatinib, dasatinib and ponatinib. **(B)** Scoring of Ki-67 staining is summarized as the mean  $\pm$  SEM. Student's *t*-test, \*\*,  $P < 0.01$ . **(C)** Scoring of TUNEL staining is summarized as the mean  $\pm$  SEM. Student's *t*-test, \*\*\*,  $P < 0.001$ . **(D)** Representative Ki-67 staining in tumors after 28 days of treatment with imatinib, dasatinib and ponatinib. Scale bar, 50 $\mu$ m. **(E)** Representative TUNEL staining in tumors after 28 days of treatment with imatinib, dasatinib and ponatinib. Scale bar, 50 $\mu$ m.

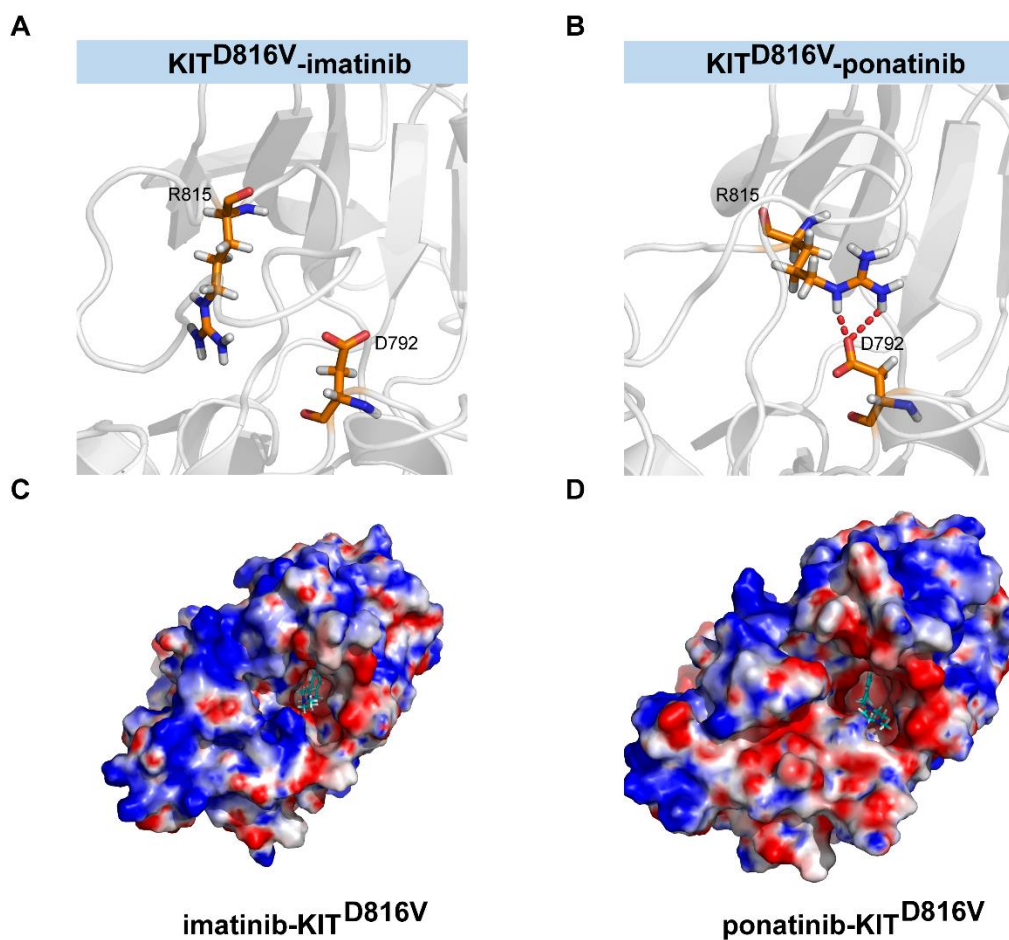

**Figure S8.** The salt bridge D792•••R815 changed the distribution of the charges of the residues in the region of the ATP binding site. **(A-B)** Salt-bridges calculated over the MD simulations of imatinib/ponatinib-*KIT<sup>D816V</sup>* complexes. Conformations of *KIT<sup>D816V</sup>* are shown as cartoons, residues R815 and D792 are drawn in sticks, and salt-bridges are shown by dashed lines. **(C-D)** Electrostatic potential (EP) surface of the imatinib-*KIT<sup>D816V</sup>* complexes. EP calculations on the Connolly solvent-accessible surfaces of the receptors were performed with the APBS software. The color scale ranges from red (electronegative potential) through white (neutral) to blue (electropositive potential).



## Supplementary tables

**Table S1. Summary of IC<sub>50</sub> values of *KIT* inhibitors in PDCs proliferation assays.**

| <i>Inhibitor</i> | <i>Chemical Structure</i>                                                           | <i>V560D</i> | <i>K642E</i> | <i>D816V</i> | <i>WT</i> |
|------------------|-------------------------------------------------------------------------------------|--------------|--------------|--------------|-----------|
| <i>Axitinib</i>  | 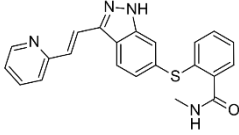   | 23.98        | 313.1        | 335.6        | >10,000   |
| <i>Dasatinib</i> |    | 34.59        | 148.6        | 207.8        | >10,000   |
| <i>Imatinib</i>  |   | 75.66        | 2752         | 4840         | >10,000   |
| <i>Nilotinib</i> |  | 58.79        | 1219         | 1891         | >10,000   |
| <i>Ponatinib</i> |  | 39.05        | 207.6        | 174.3        | >10,000   |
| <i>Sorafenib</i> |  | 232.4        | 3612         | 7224         | >10,000   |
| <i>Sunitinib</i> |  | 1432         | >10000       | >10000       | >10,000   |

**Table S2. Summary of IC<sub>50</sub> values of *KIT* inhibitors in Ba/F3 proliferation assays.**

|               | <i>Axi</i> | <i>Dasa</i> | <i>Ima</i> | <i>Nilo</i> | <i>Pona</i> | <i>Sora</i> | <i>Suni</i> |
|---------------|------------|-------------|------------|-------------|-------------|-------------|-------------|
| <i>Parent</i> | 1735.01    | 1868.93     | >10000     | >10000      | 2101.75     | >10000      | >10000      |
| <i>WT</i>     | 59.41      | 28.51       | 39.31      | 267.87      | 7.32        | 159.95      | 136.21      |
| <i>V560D</i>  | 283.67     | 88.99       | 221.39     | 1584.58     | 8.48        | 5685.08     | 376.28      |
| <i>K642E</i>  | 275.04     | 163.91      | 351.36     | 1707.29     | 10.60       | 5003.98     | 195.33      |
| <i>D816V</i>  | 704.22     | 467.245     | 572.93     | 3269.46     | 130.45      | 5955.37     | 747.65      |

**Table S3. Summary of TGI of imatinib, dasatinib and ponatinib in *KIT*<sup>WT</sup> and *KIT* mutant PDXs.**

|                  | <i>V560D</i> | <i>K642E</i> | <i>D816V</i> | <i>WT</i> |
|------------------|--------------|--------------|--------------|-----------|
| <i>Imatinib</i>  | 25.25        | 27.59        | 42.67        | 17.96     |
| <i>Dasatinib</i> | 68.65        | 81.38        | 67.73        | 33.85     |
| <i>Ponatinib</i> | 78.33        | 83.66        | 99.95        | 33.26     |

**Table S4. Summary of free binding energy in ponatinib-*KIT*<sup>WT</sup>/*KIT*<sup>D816V</sup> complexes.**

| <i>KIT</i> status | $\Delta G$ vdw | $\Delta G$ elect | $\Delta G$ sol | $\Delta G$ bind |
|-------------------|----------------|------------------|----------------|-----------------|
| Wild Type         | -76.21         | -19.72           | 24.39          | -71.54          |
| D816V             | -75.11         | -26.76           | 26.50          | -75.38          |
